# Supplementary material for: Presence of Fibroids on Transvaginal Ultrasonography in a Community-Based, Diverse Cohort of 996 Reproductive-Age Female Participants
Source: PubMed Central journal article supplement (PMC10173016; doi:10.1001/jamanetworkopen.2023.12701), 2023-05-10
Supplement: jamanetwopen-e2312701-s001.pdf [file jamanetwopen-e2312701-s001.pdf]

## Supplemental Online Content

Huang D, Magaoay B, Rosen MP, Cedars MI. Presence of fibroids on transvaginal ultrasonography in a community-based, diverse cohort of 996 reproductive-age female participants. *JAMA Netw Open*. 2023;6(5):e2312701.  
doi:10.1001/jamanetworkopen.2023.12701

**eTable.** Logistic Regression Analyses of Association Between Race and Ethnicity and Presence of Fibroids

This supplemental material has been provided by the authors to give readers additional information about their work.

**eTable.** Logistic Regression Analyses of Association Between Race and Ethnicity and Presence of Fibroids

| Variable                           | Unadjusted OR    |         | Adjusted OR Model 1 <sup>a</sup> |         | Adjusted OR Model 2 <sup>b</sup> |         |
|------------------------------------|------------------|---------|----------------------------------|---------|----------------------------------|---------|
|                                    | OR (95% CI)      | P value | OR (95% CI)                      | P value | OR (95% CI)                      | P value |
| Race/ethnicity (compared to White) |                  |         |                                  |         |                                  |         |
| Black                              | 4.65 (2.94-7.36) | <0.01   | 4.85 (3.01-7.81)                 | <0.01   | 4.72 (2.72-8.18)                 | <0.01   |
| Hispanic                           | 1.21 (0.71-2.08) | 0.48    | 1.24 (0.72-2.15)                 | 0.43    | 1.40 (0.74-2.64)                 | 0.31    |
| Asian                              | 2.34 (1.43-3.82) | <0.01   | 2.50 (1.51-4.54)                 | <0.01   | 3.35 (1.95-5.76)                 | <0.01   |
| Age (compared to 25-29)            |                  |         |                                  |         |                                  |         |
| Age 30-34                          |                  |         | 1.75 (0.95-3.26)                 | 0.08    | 1.80 (0.96-3.37)                 | 0.07    |
| Age 35-39                          |                  |         | 4.47 (2.55-7.82)                 | <0.01   | 5.01 (2.80-8.95)                 | <0.01   |
| Age 40-45                          |                  |         | 5.65 (3.25-9.85)                 | <0.01   | 6.18 (3.46-11.05)                | <0.01   |
| Parous status                      |                  |         |                                  |         | 0.71 (0.48-1.06)                 | 0.10    |
| Current smoking                    |                  |         |                                  |         | 2.75 (1.55-4.89)                 | <0.01   |
| Obesity (BMI ≥ 30)                 |                  |         |                                  |         | 1.63 (1.08-2.46)                 | 0.02    |
| College graduate                   |                  |         |                                  |         | 0.96 (0.65-1.44)                 | 0.86    |

<sup>a</sup>Model 1: adjusted for age

<sup>b</sup>Model 2: adjusted for age, prior parity, current smoking, obesity (BMI≥30), and college graduate attainment
