# Supplementary material for: Presence of Fibroids on Transvaginal Ultrasonography in a Community-Based, Diverse Cohort of 996 Reproductive-Age Female Participants
Source: PubMed Central journal article supplement (PMC10173016; doi:10.1001/jamanetworkopen.2023.12701), 2023-05-10
Supplement: jamanetwopen-e2312701-s002.pdf [file jamanetwopen-e2312701-s002.pdf]

## Data Sharing Statement

Huang. Presence of Fibroids on Transvaginal Ultrasonography in a Community-Based, Diverse Cohort of 996 Reproductive-Age Female Participants. *JAMA Netw Open*. Published May 10, 2023. doi:10.1001/jamanetworkopen.2023.12701

### Data

**Data available:** Yes

**Data types:** Deidentified participant data

**How to access data:** [David.Huang@ucsf.edu](mailto:David.Huang@ucsf.edu)

**When available:** With publication

### Supporting Documents

**Document types:** None

### Additional Information

**Who can access the data:** Researchers whose proposed use of the data has been approved

**Types of analyses:** For a specified purpose and research question, or as baseline data for future studies

**Mechanisms of data availability:** With investigator support, after approval of a proposal, and with a signed data access agreement

**Any additional restrictions:** N/A
